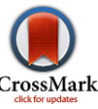

# Neutralizing and IgG Antibodies against Simian Virus 40 in Healthy Pregnant Women in Italy

Manola Comar<sup>1,2\*</sup>, Connie Wong<sup>3</sup>, Mauro Tognon<sup>4</sup>, Janet S. Butel<sup>3</sup>

**1** Medical Science Department, University of Trieste, Trieste, Italy, **2** Institute for Maternal and Child Health – IRCCS “Burlo Garofolo”, Trieste, Italy, **3** Department of Molecular Virology and Microbiology, Baylor College of Medicine, Houston, Texas, United States of America, **4** Department of Morphology, Surgery and Experimental Medicine, Section of Pathology, Oncology and Experimental Biology, School of Medicine, University of Ferrara, Ferrara, Italy

## Abstract

**Objective:** Polyomavirus simian virus 40 (SV40) sequences have been detected in various human specimens and SV40 antibodies have been found in human sera from both healthy individuals and cancer patients. This study analyzed serum samples from healthy pregnant women as well as cord blood samples to determine the prevalence of SV40 antibodies in pregnancy.

**Methods:** Serum samples were collected at the time of delivery from two groups of pregnant women as well as cord bloods from one group. The women were born between 1967 and 1993. Samples were assayed by two different serological methods, one group by neutralization of viral infectivity and the other by indirect ELISA employing specific SV40 mimotopes as antigens. Viral DNA assays by real-time polymerase chain reaction were carried out on blood samples.

**Results:** Neutralization and ELISA tests indicated that the pregnant women were SV40 antibody-positive with overall prevalences of 10.6% (13/123) and 12.7% (14/110), respectively. SV40 neutralizing antibodies were detected in a low number of cord blood samples. Antibody titers were generally low. No viral DNA was detected in either maternal or cord bloods.

**Conclusions:** SV40-specific serum antibodies were detected in pregnant women at the time of delivery and in cord bloods. There was no evidence of transplacental transmission of SV40. These data indicate that SV40 is circulating at a low prevalence in the northern Italian population long after the use of contaminated vaccines.

**Citation:** Comar M, Wong C, Tognon M, Butel JS (2014) Neutralizing and IgG Antibodies against Simian Virus 40 in Healthy Pregnant Women in Italy. PLoS ONE 9(10): e110700. doi:10.1371/journal.pone.0110700

**Editor:** Cristina Costa, University Hospital San Giovanni Battista di Torino, Italy

**Received:** June 4, 2014; **Accepted:** September 18, 2014; **Published:** October 21, 2014

**Copyright:** © 2014 Comar et al. This is an open-access article distributed under the terms of the Creative Commons Attribution License, which permits unrestricted use, distribution, and reproduction in any medium, provided the original author and source are credited.

**Data Availability:** The authors confirm that all data underlying the findings are fully available without restriction. All relevant data are within the paper.

**Funding:** This work was supported in part by research grant R01 CA104818 (JSB) from the National Institutes of Health, United States of America, the University of Trieste (MC), and the University of Ferrara (MT), Italy. The funders had no role in study design, data collection and analysis, decision to publish, or preparation of the manuscript.

**Competing Interests:** The authors have declared that no competing interests exist.

\* Email: manola.comar@burlo.trieste.it

## Introduction

Simian virus 40 (SV40), a monkey polyomavirus, was discovered in 1960 as a contaminant of poliovirus vaccines which had been produced in naturally infected macaque kidney cells [1]. SV40-contaminated vaccines were inadvertently administered to millions of recipients between 1955 and 1963, providing a documented source of human exposure to SV40 [2–4]. The virus is widely recognized as having potent cell transforming ability *in vitro* and oncogenic activity in experimental animals [4–7]. This activity raised a concern that SV40 might cause human infections and perhaps contribute to cancer development.

SV40 DNA sequences have been detected in blood, urine, and tissue samples from healthy individuals [8–23]. SV40 DNA also has been found in association with several types of human cancer, including brain tumors, mesotheliomas, osteosarcomas, and lymphomas [8,10,11,13,24–39]. However, the International Agency for Research on Cancer decided recently that there was not enough firm evidence to classify SV40 as a carcinogenic viral

agent of humans [40]. Although there is strong evidence that infections have occurred in certain populations in different geographic regions, more studies are needed of the current prevalence of SV40 infections in humans and the natural history of those infections [3,4,39,41,42].

Seroprevalence surveys are a common approach to examining the distribution of a virus within a host population. Neutralization assays, the most highly specific method for detection of viral antibodies in human sera, have been used in many studies [4,9,43–48]. SV40 seroprevalences generally have been in the range of 5–8%, although higher rates were detected in children who had received kidney transplants, in a group of HIV-positive men, and in Hispanic women in Texas (USA) [9,44,48]. However, this methodology is time consuming, labor intensive, lengthy, expensive, and requires specialized skills. Because of these limitations, neutralization assays are not practical for large epidemiological studies. Detection of SV40 antibodies has been attempted using enzyme immunoassays and SV40 virus-like particles or soluble capsid proteins. In those assays, all binding antibodies are

measured, including non-neutralizing ones and those that recognize cross-reacting antigens on BK virus (BKV) and JC virus (JCV), resulting in some non-specificity concerns [49–51]. A newly developed ELISA employing specific SV40 synthetic peptides mimicking epitopes of viral capsid proteins VP1–3 seems to circumvent those problems [52–57]. Recent studies with this new assay have documented SV40 antibodies in Italian populations with estimated seroprevalences of 10–18%. Higher prevalences have been observed among patients with mesotheliomas and glioblastomas [53,57].

Both DNA-based studies and serological surveys have detected SV40 markers in individuals too young to have been exposed to SV40-contaminated vaccines. These observations suggest that SV40 is being horizontally transmitted in humans. Maternal-infant transmission has been hypothesized to be a possible route of transmission of polyomaviruses [58]. This has been shown to occur in animal models, but no data substantiate that mode of transmission in humans [59–64]. This study was designed to determine the prevalence of SV40 antibodies in pregnant women and in their newborns and to examine the possibility of transplacental transmission of the virus.

## Materials and Methods

### Samples

Serum samples were collected at the time of delivery from a total of 233 healthy pregnant women and 100 matched cord blood samples from newborns. The enrolled women and their offspring were all of Caucasian origin and all the women were in their first pregnancy. Maternal serum collections represented two cohorts (Cohort A,  $n = 123$ , and Cohort B,  $n = 110$ ), from Trieste and Ferrara, Italy, respectively. Cord blood samples [Cohort A(cb),  $n = 100$ ] were collected at time of delivery of mothers in Cohort A. The demographics of study participants are shown in Table 1. The first group of maternal serum samples (Cohort A,  $n = 123$ ) and a portion of the cord blood samples ( $n = 13$ ) were analyzed for SV40 neutralizing antibodies in the Department of Molecular Virology and Microbiology, Baylor College of Medicine, Houston, Texas, USA, using a plaque-reduction neutralization assay [44,47,48]. The remaining cord blood samples ( $n = 87$ ) were assayed at the University of Trieste, Trieste, Italy, using a neutralization test of inhibition of viral cytopathic effects (CPE) [52]. The other set of serum samples from pregnant women (Cohort B,  $n = 110$ ) was tested by an indirect ELISA using specific mimotopes from SV40 viral capsid proteins at the University of Ferrara, Ferrara, Italy [52]. At the time of enrollment, study participants provided written informed consent. The study was approved by the Institutional Review Board for Human Subject Research at Baylor College of Medicine, the Institutional Scientific Board of the Burlo-Garofolo Children's Hospital, Trieste, and the County Ethical Committee, Ferrara.

### SV40 neutralization assays

Two neutralization assays were used to detect SV40 serological reactivity. A plaque-reduction assay was performed using TC-7 cells as previously described [44,47,48]. Briefly, heat-inactivated serum samples were diluted in Tris-buffered saline (TBS; pH 7.4) and mixed with equal volumes of SV40 diluted to contain approximately 100 plaque-forming units (PFU) per 0.1 ml. Controls for each assay included: virus only, normal serum control (virus mixed with serum lacking SV40 antibodies), positive serum control (virus mixed with rabbit hyperimmune serum having high neutralizing activity), and uninoculated cells. Samples were incubated at 37°C for 30 min. TC-7 cell monolayers in 60-mm<sup>2</sup>

tissue culture plates were then inoculated with 0.2 ml of virus-serum mixture per culture and inocula were adsorbed for 2 h. Cell monolayers were overlaid with a mixture of agar and enriched Eagle medium. Plaques were counted on day 15. Each sample was tested in triplicate. Initial tests were carried out using final serum dilutions of 1:10, and positive samples (those that reduced the number of plaques by  $\geq 50\%$  compared to the virus-only control) were titered in repeat experiments to determine the endpoint neutralization titers. A modified neutralization assay using CV-1 cells and based on inhibition of viral CPE was previously described [52]. Sera diluted 1:20 were mixed with  $5 \times 10^4$  PFU of SV40. Following a 30-min incubation, the mixture was applied to CV-1 monolayers for 2 h. The cell monolayers were then washed three times, fresh media was added, and cultures were observed for CPE for 21 days. Samples were tested in duplicate and neutralizing activity was evidenced by inhibition of CPE.

### Indirect enzyme-linked immunosorbent assay (ELISA) with SV40 synthetic peptides

An indirect ELISA developed to detect SV40-specific antibodies using two synthetic peptides based on sequences of SV40 viral proteins VP1 and VP2/3 was performed as detailed previously [52,54]. These peptides were VP1 B: NH<sub>2</sub>- NPDEHQKGLSK-SLAAEKQFTDDSP- COOH; and VP2/3 C: NH<sub>2</sub>- IQN-DIPRLTSQELERRTQRYLRD- COOH. The human peptide hNPS, sequence SFRNGVGTGMKKT SFQRAKS, was employed as a negative control peptide [52,56]. The synthetic peptides were synthesized by standard procedures and were purchased from UFPeptides s.r.l., Ferrara, Italy. Comparative computer-assisted analyses using a BLAST program were carried out previously with the SV40 VP peptides B and C and the corresponding amino acid sequences of the new human polyomaviruses (HPyV) and hundreds of different BKV and JCV serotypes [52,54]. Results indicated a low homology for the BKV and JCV prototypes and other polyomaviruses. This assay does not cross-react with BKV and JCV hyperimmune sera (negative controls) [52,54]. Hyperimmune sera against SV40 and BKV were obtained in rabbits that had been inoculated with purified viral stocks as reported previously, whereas SV40-positive human sera were from a serum collection [52]. The serum against JCV was kindly provided by Dr. E. Major, NIH, Bethesda, MD, USA [52,54]. Briefly, each well was coated with 5  $\mu$ g of peptide in 100  $\mu$ l of Coating Buffer (Candor Bioscience, Germany) at 4°C for 16 h, followed by 200  $\mu$ l/well of Blocking Solution (Candor Bioscience) at 37°C for 90 min. Wells were covered with 100  $\mu$ l of test serum diluted 1:20 in Low Cross-Buffer (Candor Bioscience). The secondary antibody was a goat anti-human or anti-rabbit IgG heavy and light chain-specific peroxidase conjugate (Calbiochem-Merck, Germany) diluted 1:10,000 in Low Cross-Buffer. Samples were treated with 2,2-azino-bis 3-ethylbenzthiazoline-6-sulfonic acid (ABTS) solution (Sigma-Aldrich, Milan), for 45 min at room temperature and then read spectrophotometrically at a wavelength of 405 nm. The cut-off was determined in each assay by an OD reading of two negative controls, added to the standard deviation and multiplied three times (+3SD). Positive and negative controls included immune rabbit serum containing SV40 antibodies, immune sera containing BKV or JCV antibodies, and three human serum samples known to be SV40 negative. Each sample was analyzed in duplicate three times. Sera were considered to be SV40 antibody-positive if they reacted with both peptides three different times by indirect ELISA. SV40 antibody titers were determined by testing serial dilutions of positive sera.

**Table 1.** Demographic characteristics of pregnant women in Italy analyzed for SV40 seropositivity.

| Characteristics          | Cohort A       | Cohort B       |
|--------------------------|----------------|----------------|
| Total subjects           | 123            | 110            |
| Dates enrolled           | 2004–2005      | 2006–2011      |
| Age, mean (range), years | 30 (25–37)     | 36 (30–42)     |
| Race, Caucasian          | 123            | 110            |
| First pregnancy          | 123            | 110            |
| Cord blood from newborns | 100            | 0              |
| Geographic location      | Trieste, Italy | Ferrara, Italy |

doi:10.1371/journal.pone.0110700.t001

### Viral DNA assay

DNA was extracted from 500  $\mu$ l of total cord blood and maternal peripheral blood samples using a commercial kit (QIAamp Tissue Kit; Qiagen, Mannheim, Germany) following the manufacturer's instructions. DNA was eluted in 100  $\mu$ l TE buffer and stored at  $-80^{\circ}\text{C}$  until analyzed. Real-time polymerase chain reaction (PCR) assays for SV40 and BKV DNA were carried out using primers and probes and assay conditions as described [23,65]. In brief, real time PCR was performed using the ABI PRISM 7000 Sequence Detection System according to the manufacturer's recommendations. Primers and probes were designed to detect sequences in the conserved N-terminal region of the large T-ag gene. Plasmids containing full-length viral genomes, SV40-B2E and BKV-Dunlop-1, were used as positive controls while negative controls were reactions without DNA. For clinical samples, 10  $\mu$ l of DNA per reaction were tested in duplicate. For standards, 10  $\mu$ l of DNA which contained viral copy numbers ranging from  $10^7$  copies to  $10^0$  copies were also tested in duplicate. Real time PCR was performed for the single copy human RNase P gene to establish the suitability of DNA test samples for analysis [65].

### Statistical analysis

Statistical significance between two groups was determined using Student's *t* test. A finding of  $p \leq 0.05$  was considered to be statistically significant. The profile of serum antibody reactivity to SV40 mimotopes was statistically analyzed using Anova and Newman-Keuls Comparison tests [52,54,56,57,66].

## Results

### Serum neutralizing antibodies to SV40 in pregnant women and their newborns

Serum samples were collected from 123 pregnant women at the time of delivery (Cohort A) as well as cord blood samples from 100 of their newborns [Cohort A(cb)]. These samples were assayed for SV40-specific antibodies using neutralization assays (Table 2). Plaque-reduction assays revealed that 13/123 (10.6%) of the maternal sera were positive for SV40 neutralizing antibodies. In the majority of positive samples the neutralizing antibody titer was low (1:10), but two samples had titers of 1:40 and 1:160, respectively.

Among the newborn cord bloods, 7 of 100 (7.0%) contained detectable SV40 neutralizing antibodies at low titers (Table 2). The antibody-positive samples were in the subset analyzed by the plaque-reduction neutralization assay (Materials and Methods). No matches between positivity of maternal sera and cord bloods were observed.

### Absence of viral DNA

Viral DNA assays by real time PCR were carried out on DNAs recovered from maternal peripheral blood (Cohort A,  $n = 123$ ) or from cord blood [Cohort A(cb),  $n = 100$ ] samples. No SV40 or BKV DNA was detected in any of the samples.

### IgG antibodies reacting with SV40 mimotopes in serum samples from pregnant women

Serum samples from additional pregnant women (Cohort B,  $n = 110$ ) were analyzed by indirect ELISA for the presence of IgG class antibodies reactive against SV40 VP mimotopes, VP1 B and VP2/3 C [52]. In this group of sera, the prevalence of specific SV40 antibodies was determined to be 12.7% (14/110) (Table 2). Samples seropositive for SV40 VP1 B were also found to be positive for SV40 VP2/3 C, and vice versa, with negligible exceptions. Sera were considered to be SV40-positive when reactive with both VP1 B and VP2/3 C peptides. The difference in prevalence of SV40 antibodies detected in Cohort A by neutralization (10.6%) and in Cohort B by ELISA (12.7%) was not statistically significant ( $p > 0.05$ ).

### Age distribution of SV40 antibodies

SV40 seropositivity rates were compared for both birth cohorts of pregnant women (Table 3). The groups were subdivided in several ways to approximately equalize subject numbers in Cohort A and in Cohort B and in the span of birth years for comparison purposes. SV40 antibody-positive samples were distributed among all birth cohorts. None of the differences in seropositivity for the various comparisons was statistically significant ( $p > 0.05$ ).

## Discussion

This study provides SV40 seroprevalence data for women from a geographic region in northeastern Italy. Evidence of SV40 infection has been observed in children with immune defects and in adult patients with mesothelioma or colon cancer from this area [23,25,67,68]. This study found that overall 10.6% of pregnant women were seropositive for SV40 neutralizing antibodies and 12.7% were positive for SV40-specific IgG antibodies (Tables 2, 3). The detection of SV40 antibodies in cord blood from 7.0% of newborns of mothers in Cohort A provides another indication of maternal seropositivity. These findings substantiate previous observations of SV40 antibodies in Italian blood donors and other populations [52–57].

The overall prevalence of SV40 IgG antibodies detected in healthy pregnant women by ELISA (12.7%) was similar to the estimate based on neutralization assays (10.3%); the difference was not statistically significant. Taken together, these data provide a

**Table 2.** Detection of SV40 antibodies in sera from pregnant women and in cord blood.

| Cohort             | Type of sample      | Assay                                              | Number tested    | Number SV40 antibody-positive (%) |
|--------------------|---------------------|----------------------------------------------------|------------------|-----------------------------------|
| A                  | Pregnant women sera | Neutralization plaque reduction                    | 123              | 13 (10.6)                         |
| B                  | Pregnant women sera | Indirect ELISA                                     | 110 <sup>a</sup> | 14 (12.7)                         |
| A(cb) <sup>b</sup> | Cord blood          | Neutralization plaque reduction, inhibition of CPE | 100              | 7 (7.0)                           |

<sup>a</sup>Some of these subjects (n=94) were included in a previous report [53].

<sup>b</sup>Cord bloods were collected at time of delivery of women in Cohort A.

doi:10.1371/journal.pone.0110700.t002

comprehensive analysis of SV40 seroprevalence in pregnancy in northern Italy. Whereas it would have been desirable to perform both immunological tests on the same sera, sample availability precluded that approach.

The pregnant women in Cohort A of this study were born from 1967 to 1980 and those in Cohort B from 1967 to 1993. Italy started using the live, attenuated Sabin polio vaccine strains in 1964 [16,69]. As contaminated poliovaccines were supposedly virus-free from SV40 after 1963, it is unlikely that vaccine exposure explains that SV40 antibody positivity. An earlier study of Italian organ donors detected SV40 DNA in blood samples at similar prevalence in birth cohorts born from 1924 to 1983 [16]. These data together indicate that other sources of SV40 exposure must exist in the human population and that infections likely reflect human-to-human spread [3,4,16,39]. Interestingly, fecal excretion of polyomaviruses BKV and SV40 has been detected in one-year-old children in Mexico City, suggesting that the gastrointestinal tract may be a site of polyomavirus persistence in humans and that fecal contamination could be a source of virus transmission [3,70].

SV40 antibody titers detected in maternal sera tended to be low, with titers that were comparable to those reported in other studies of SV40 neutralizing antibody responses in humans [9,44–48,71–74]. The titers could be a reflection of a weak human immune

response to SV40, of limited replication of the virus in human cells, and/or of waning of SV40 antibodies over time [75]. The presence of SV40 antibodies in some cord bloods is not unexpected as it is known that maternal IgG antibodies can pass through the placenta to a fetus during pregnancy. The discordance observed in antibody detection in maternal sera and matched cord bloods probably reflects the low antibody titers and the complexities of the neutralization assays.

The transient immunosuppression associated with pregnancy could allow reactivation of latent viruses, including polyomaviruses, raising the theoretical possibility of transplacental transmission from mother to fetus. More frequent detection in urine samples from pregnant women has been reported for BKV but not for other polyomaviruses [76,77]. Transplacental transmission of polyomaviruses can occur in animals, including murine polyomavirus in mice and rats and SV40 in hamsters and rhesus monkeys [59–64]. Although BKV DNA has been detected in autopsy tissues of aborted human fetuses, evidence of transplacental transmission is seldom found; if such transmission occurs, it must be a rare event [77–84]. In this study there was no evidence of transplacental transmission as no SV40 viral DNA was detected in maternal peripheral blood or in cord blood. It is possible that transmission *in utero* might occur if the mother suffered a primary

**Table 3.** Age distribution of SV40 antibodies in pregnant women.

| Year of birth               | Cohort A <sup>a</sup>                           |                 | Cohort B <sup>b</sup>                           |                 |
|-----------------------------|-------------------------------------------------|-----------------|-------------------------------------------------|-----------------|
|                             | No. SV40 antibody positive sera/No. sera tested | % SV40 positive | No. SV40 antibody positive sera/No. sera tested | % SV40 positive |
| 1967–1970                   | 7/29                                            | 24.1            | 4/36                                            | 11.1            |
| 1971–1974                   | 2/25                                            | 8.0             | 4/38                                            | 10.5            |
| 1975–1978                   | 1/15                                            | 6.7             | 4/20                                            | 20.0            |
| 1979–1980/1993 <sup>c</sup> | 3/54                                            | 5.6             | 2/16                                            | 12.5            |
| Total:                      | 13/123                                          | 10.6            | 14/110                                          | 12.7            |
| Comparison of birth groups: |                                                 |                 |                                                 |                 |
| 1967–1972                   | 8/43                                            | 18.6            | 6/60                                            | 10.0            |
| 1973–1980/1993              | 5/80                                            | 6.2             | 8/50                                            | 16.0            |
| 1967–1975                   | 9/60                                            | 15.0            | 9/83                                            | 10.8            |
| 1976–1980/1993              | 4/63                                            | 6.3             | 4/27                                            | 14.8            |
| 1967–1978                   | 10/69                                           | 14.5            | 12/94                                           | 12.8            |
| 1979–1980/1993              | 3/54                                            | 5.6             | 2/16                                            | 12.5            |

<sup>a</sup>Samples collected 2004–2005.

<sup>b</sup>Samples collected 2006–2011.

<sup>c</sup>Cohort A contained subjects born through 1980; cohort B contained subjects born through 1993.

doi:10.1371/journal.pone.0110700.t003

viral infection during pregnancy, as higher levels of replicating virus would be present at that time.

In summary, the detection of SV40 antibodies in pregnant women in northern Italy strengthens the evidence that SV40, or a closely related unknown virus, is causing infections in humans years after the use of SV40-contaminated vaccines. The significance of those infections to the health of the affected individuals is unknown.

## References

- Sweet BH, Hilleman MR (1960) The vacuolating virus, S.V.<sub>40</sub>. *Proc Soc Exp Biol Med* 105: 420–427.
- Shah K, Nathanson N (1976) Human exposure to SV40: review and comment. *Am J Epidemiol* 103: 1–12.
- Butel JS (2012) Patterns of polyomavirus SV40 infections and associated cancers in humans: a model. *Curr Opin Virol* 2: 508–514.
- Butel JS (2012) Polyomavirus SV40: model infectious agent of cancer. In: Robertson E, editors. *Cancer Associated Viruses*. Springer Science. 377–417.
- Javier RT, Butel JS (2008) The history of tumor virology. *Cancer Res* 68: 7693–7706.
- Pipas JM (2009) SV40: Cell transformation and tumorigenesis. *Virology* 384: 294–303.
- Gjoerup O, Chang Y (2010) Update on human polyomaviruses and cancer. *Adv Cancer Res* 106: 1–51.
- Martini F, Iaccheri L, Lazzarin L, Carinci P, Corallini A, et al. (1996) SV40 early region and large T antigen in human brain tumors, peripheral blood cells, and sperm fluids from healthy individuals. *Cancer Res* 56: 4820–4825.
- Jafar S, Rodriguez-Barradas M, Graham DY, Butel JS (1998) Serological evidence of SV40 infections in HIV-infected and HIV-negative adults. *J Med Virol* 54: 276–284.
- Yamamoto H, Nakayama T, Murakami H, Hosaka T, Nakamata T, et al. (2000) High incidence of SV40-like sequences detection in tumour and peripheral blood cells of Japanese osteosarcoma patients. *Br J Cancer* 82: 1677–1681.
- David H, Mendoza S, Konishi T, Miller CW (2001) Simian virus 40 is present in human lymphomas and normal blood. *Cancer Lett* 162: 57–64.
- Li RM, Branton MH, Tanawattanacharoen S, Falk RA, Jennette JC, et al. (2002) Molecular identification of SV40 infection in human subjects and possible association with kidney disease. *J Am Soc Nephrol* 13: 2320–2330.
- Martini F, Lazzarin L, Iaccheri L, Vignocchi B, Finocchiaro G, et al. (2002) Different simian virus 40 genomic regions and sequences homologous with SV40 large T antigen in DNA of human brain and bone tumors and of leukocytes from blood donors. *Cancer* 94: 1037–1048.
- Milstone A, Vilchez RA, Geiger X, Fogo AB, Butel JS, et al. (2004) Polyomavirus simian virus 40 infection associated with nephropathy in a lung-transplant recipient. *Transplantation* 77: 1019–1024.
- Vanchiere JA, Nicome RK, Greer JM, Demmler GJ, Butel JS (2005) Frequent detection of polyomaviruses in stool samples from hospitalized children. *J Infect Dis* 192: 658–664.
- Paracchini V, Garte S, Pedotti P, Poli F, Frison S, et al. (2005) Molecular identification of simian virus 40 infection in healthy Italian subjects by birth cohort. *Mol Med* 11: 48–51.
- Vanchiere JA, White ZS, Butel JS (2005) Detection of BK virus and simian virus 40 in the urine of healthy children. *J Med Virol* 75: 447–454.
- Paracchini V, Garte S, Pedotti P, Taioli E (2006) Review of prevalence of Simian Virus 40 (SV40) genomic infection in healthy subjects. *Mutat Res* 612: 77–83.
- Patel NC, Vilchez RA, Killen DE, Zanwar P, Sroller V, et al. (2008) Detection of polyomavirus SV40 in tonsils from immunocompetent children. *J Clin Virol* 43: 66–72.
- Vanchiere JA, Abudayyeh S, Copeland CM, Lu LB, Graham DY, et al. (2009) Polyomavirus shedding in the stool of healthy adults. *J Clin Microbiol* 47: 2388–2391.
- Lapin BA, Chikobava MG (2009) [Detection of SV40 in blood samples from healthy subjects in the Russian Federation by RT-PCR] [Article in Russian]. *Vestn Ross Akad Med Nauk* issue 4: 7–10.
- Pancaldi C, Balatti V, Guaschino R, Vaniglia F, Corallini A, et al. (2009) Simian virus 40 sequences in blood specimens from healthy individuals of Casale Monferrato, an industrial town with a history of asbestos pollution. *J Infect* 58: 53–60.
- Comar M, Zanotta N, Bovenzi M, Campello C (2010) JCV/BKV and SV40 viral load in lymphoid tissues of young immunocompetent children from an area of north-east Italy. *J Med Virol* 82: 1236–1240.
- Bergsagel DJ, Finegold MJ, Butel JS, Kupsky WJ, Garcea RL (1992) DNA sequences similar to those of simian virus 40 in ependymomas and choroid plexus tumors of childhood. *N Engl J Med* 326: 988–993.
- Comar M, Rizzardi C, de Zotti R, Melato M, Bovenzi M, et al. (2007) SV40 multiple tissue infection and asbestos exposure in a hyperendemic area for malignant mesothelioma. *Cancer Res* 67: 8456–8459.
- Carbone M, Rizzo P, Procopio A, Giuliano M, Pass HI, et al. (1996) SV40-like sequences in human bone tumors. *Oncogene* 13: 527–535.
- Carbone M, Pass HI, Rizzo P, Marinetti M, Di Muzio M, et al. (1994) Simian virus 40-like DNA sequences in human pleural mesothelioma. *Oncogene* 9: 1781–1790.
- Lednický JA, Garcea RL, Bergsagel DJ, Butel JS (1995) Natural simian virus 40 strains are present in human choroid plexus and ependymoma tumors. *Virology* 212: 710–717.
- Lednický JA, Stewart AR, Jenkins JJ, III, Finegold MJ, Butel JS (1997) SV40 DNA in human osteosarcomas shows sequence variation among T-antigen genes. *Int J Cancer* 72: 791–800.
- Martini F, Dolcetti R, Gloghini A, Iaccheri L, Carbone A, et al. (1998) Simian-virus-40 footprints in human lymphoproliferative disorders of HIV<sup>-</sup> and HIV<sup>+</sup> patients. *Int J Cancer* 78: 669–674.
- Martini F, Dolcetti R, Wiethege T, Wistuba II, Milchgrub S, Muller KM, et al. (2000) Presence of simian virus 40 sequences in malignant pleural, peritoneal and noninvasive mesotheliomas. *Int J Cancer* 85: 743–745.
- Vilchez RA, Lednický JA, Halvorson SJ, White ZS, Kozinetz CA, et al. (2002) Detection of polyomavirus simian virus 40 tumor antigen DNA in AIDS-related systemic non-Hodgkin lymphoma. *J Acquir Immune Defic Syndr* 29: 109–116.
- Vilchez RA, Madden CR, Kozinetz CA, Halvorson SJ, White ZS, et al. (2002) Association between simian virus 40 and non-Hodgkin lymphoma. *Lancet* 359: 817–823.
- Arrington AS, Moore MS, Butel JS (2004) SV40-positive brain tumor in scientist with risk of laboratory exposure to the virus. *Oncogene* 23: 2231–2235.
- Shivapurkar N, Takahashi T, Reddy J, Zheng Y, Stastny V, et al. (2004) Presence of simian virus 40 DNA sequences in human lymphoid and hematopoietic malignancies and their relationship to aberrant promoter methylation of multiple genes. *Cancer Res* 64: 3757–3760.
- Meneses A, Lopez-Terrada D, Zanwar P, Killen DE, Monterroso V, et al. (2005) Lymphoproliferative disorders in Costa Rica and simian virus 40. *Haematologica* 90: 1635–1642.
- Amara K, Trimeche M, Ziadi S, Laatiri A, Hachana M, et al. (2007) Presence of simian virus 40 DNA sequences in diffuse large B-cell lymphomas in Tunisia correlates with aberrant promoter hypermethylation of multiple tumor suppressor genes. *Int J Cancer* 121: 2693–2702.
- Heinsohn S, Szendroi M, Bielack S, zur Stadt U, Kabisch H (2009) Evaluation of SV40 in osteosarcoma and healthy population: a Hungarian-German study. *Oncol Rep* 21: 289–297.
- Butel JS (2010) Simian virus 40, human infections, and cancer: emerging concepts and causality considerations. In: Khalili K, Jeang KT, editors. *Viral Oncology: Basic Science and Clinical Applications*. Hoboken, NJ: Wiley-Blackwell. 165–189.
- International Agency for Research on Cancer (2013) IARC Monographs on the Evaluation of Carcinogenic Risks to Humans, vol. 104: Malaria and Some Polyomaviruses (SV40, BK, JC, and Merkel Cell Viruses). Lyon, France: International Agency for Research on Cancer.
- Martini F, Corallini A, Balatti V, Sabbioni S, Pancaldi C, et al. (2007) Simian virus 40 in humans. *Infect Agents Cancer* 2: e13.
- Comar M, De Rocco D, Cappelli E, Zanotta N, Bottega R, et al. (2013) Fanconi anemia patients are more susceptible to infection with tumor virus SV40. *PLoS One* 8: e79683.
- Shah KV, Ozer HL, Pond HS, Palma LD, Murphy GP (1971) SV40 neutralizing antibodies in sera of US residents without history of polio immunization. *Nature* 231: 448–449.
- Butel JS, Jafar S, Wong C, Arrington AS, Opekun AR, et al. (1999) Evidence of SV40 infections in hospitalized children. *Hum Pathol* 30: 1496–1502.
- Butel JS, Wong C, Vilchez RA, Szűcs G, Dömök I, et al. (2003) Detection of antibodies to polyomavirus SV40 in two central European countries. *Centr Eur J Publ Hlth* 11: 3–8.
- Minor P, Pipkin P, Jarzebek Z, Knowles W (2003) Studies of neutralising antibodies to SV40 in human sera. *J Med Virol* 70: 490–495.
- Nurgalieva ZZ, Wong C, Zhangabylov AK, Omarbekova ZE, Graham DY, et al. (2005) Polyomavirus SV40 infections in Kazakhstan. *J Infect* 50: 142–148.
- Wong C, Vilchez RA, Quiroz J, Adam E, Butel JS (2013) Ethnic differences in polyomavirus simian virus 40 seroprevalence among women in Houston, Texas. *J Infect* 66: 67–74.
- Zimmermann W, Scherneck S, Geissler E (1983) Quantitative determination of papovavirus IgG antibodies in sera from cancer patients, labworkers and several groups of control persons by enzyme-linked immunosorbent assay (ELISA). *Zentralbl Bakteriell Mikrobiol Hyg* 254: 187–196.

## Author Contributions

Conceived and designed the experiments: MC JB. Performed the experiments: CW MT. Analyzed the data: MC JB. Contributed reagents/materials/analysis tools: JB MT. Contributed to the writing of the manuscript: MC JB.

50. Shah KV, Galloway DA, Knowles WA, Viscidi RP (2004) Simian virus 40 (SV40) and human cancer: A review of the serological data. *Rev Med Virol* 14: 231–239.
51. Kean JM, Rao S, Wang M, Garcea RL (2009) Seroepidemiology of human polyomaviruses. *PLoS Pathogens* 5: e1000363.
52. Corallini A, Mazzoni E, Taronna A, Manfrini M, Carandina G, et al. (2012) Specific antibodies reacting with simian virus 40 capsid protein mimotopes in serum samples from healthy blood donors. *Hum Immunol* 73: 502–510.
53. Mazzoni E, Corallini A, Cristaudo A, Taronna A, Tassi G, et al. (2012) High prevalence of serum antibodies reacting with simian virus 40 capsid protein mimotopes in patients affected by malignant pleural mesothelioma. *Proc Natl Acad Sci USA* 109: 18066–18071.
54. Taronna A, Mazzoni E, Corallini A, Bononi I, Pietrobon S, et al. (2013) Serological evidence of an early seroconversion to simian virus 40 in healthy children and adolescents. *PLoS One* 8: e61182.
55. Martini F, Mazzoni E, Corallini A, Taronna A, Querzoli P, et al. (2013) Breast cancer and simian virus 40 infection. *Epidemiology* 24: 464–465.
56. Mazzoni E, Tognon M, Martini F, Taronna A, Corallini A, et al. (2013) Simian virus 40 (SV40) antibodies in elderly subjects. *J Infect* 67: 356–358.
57. Mazzoni E, Gerosa M, Lupidi F, Corallini A, Taronna AP, et al. (2014) Significant prevalence of antibodies reacting with simian virus 40 mimotopes in sera from patients affected by glioblastoma multiforme. *Neuro-Oncol* 16: 513–519.
58. Comar M, Delbue S, Zanotta N, Valencic E, Piscianz E, et al. (2014) *In vivo* detection of polyomaviruses JCV and SV40 in mesenchymal stem cells from human umbilical cords. *Pediatr Blood Cancer* 61: 1347–1349.
59. McCance DJ, Mims CA (1977) Transplacental transmission of polyoma virus in mice. *Infect Immun* 18: 196–202.
60. Rachlin J, Wollmann R, Dohrmann G (1988) Inoculation of simian virus<sub>40</sub> into pregnant hamsters can induce tumors in offspring. *Lab Invest* 58: 26–30.
61. Verhagen W, Hubert CM, Mohtaschem E (1993) Tumour induction by transplacental infection with polyoma virus of the F<sub>1</sub> generation of Wistar rats. *Arch Virol* 133: 459–465.
62. Lednicky JA, Arrington AS, Stewart AR, Dai XM, Wong C, et al. (1998) Natural isolates of simian virus 40 from immunocompromised monkeys display extensive genetic heterogeneity: New implications for polyomavirus disease. *J Virol* 72: 3980–3990.
63. Zhang S, McNees AL, Butel JS (2005) Quantification of vertical transmission of *Murine polyoma virus* by real-time quantitative PCR. *J Gen Virol* 86: 2721–2729.
64. Patel NC, Halvorson SJ, Sroller V, Arrington AS, Wong C, et al. (2009) Viral regulatory region effects on vertical transmission of polyomavirus SV40 in hamsters. *Virology* 386: 94–101.
65. McNees AL, White ZS, Zanwar P, Vilchez RA, Butel JS (2005) Specific and quantitative detection of human polyomaviruses BKV, JCV, and SV40 by real time PCR. *J Clin Virol* 34: 52–62.
66. Guerrini R, Salvadori S, Rizzi A, Regoli D, Calo G (2010) Neurobiology, pharmacology, and medicinal chemistry of neuropeptide S and its receptor. *Med Res Rev* 30: 751–777.
67. Comar M, Zanotta N, Pesel G, Visconti P, Maestri I, et al. (2012) Asbestos and SV40 in malignant pleural mesothelioma from a hyperendemic area of north-eastern Italy. *Tumori* 98: 210–214.
68. Campello C, Comar M, Zanotta N, Minicozzi A, Rodella L, et al. (2010) Detection of SV40 in colon cancer: a molecular case-control study from northeast Italy. *J Med Virol* 82: 1197–1200.
69. Crovari P (2010) History of polio vaccination in Italy. *Ital J Publ Hlth* 7: 322–324.
70. Vanchiere JA, Carillo B, Morrow AL, Jiang X, Ruiz-Palacios GM, et al. (2014) Fecal polyomavirus excretion in infancy. *J Pediatr Infect Dis Soc*, in press.
71. Horváth LB (1972) SV40 neutralizing antibodies in the sera of man and experimental animals. *Acta Virologica* 16: 141–146.
72. Shah KV (1972) Evidence for an SV40-related papovavirus infection of man. *Am J Epidemiol* 95: 199–206.
73. Shah KV, McCrumb FRJ, Daniel RW, Ozer HL (1972) Serologic evidence for a simian-virus-40-like infection of man. *J Natl Cancer Inst* 48: 557–561.
74. Brown P, Morris JA (1976) Serologic response to BK Virus following human infection with SV40. *Proc Soc Exp Biol Med* 152: 130–131.
75. Lundstig A, Eliasson L, Lehtinen M, Sasnauskas K, Koskela P, et al. (2005) Prevalence and stability of human serum antibodies to simian virus 40 VP1 virus-like particles. *J Gen Virol* 86: 1703–1708.
76. Csoma E, Sápy T, Mészáros B, Gergely L (2012) Novel human polyomaviruses in pregnancy: higher prevalence of BKPyV, but no WUPyV, KIPyV and HPyV9. *J Clin Virol* 55: 262–265.
77. Kalvatchev Z, Slavov S, Shtereva M, Savova S (2008) Reactivation of *Polyomavirus hominis 1* (BKV) during pregnancy and the risk of mother-to-child transmission. *J Clin Virol* 43: 328–329.
78. Penta M, Lukic A, Conte MP, Chiarini F, Fioriti D, et al. (2003) Infectious agents in tissues from spontaneous abortions in the first trimester of pregnancy. *New Microbiol* 2003: 329–337.
79. Sadeghi M, Riipinen A, Väisänen E, Chen T, Kantola K, et al. (2010) Newly discovered KI, WU, and Merkel cell polyomaviruses: no evidence of mother-to-fetus transmission. *Virol J* 7: e251.
80. Pietropaolo V, Di Taranto C, Degener AM, Jin L, Sinibaldi L, et al. (1998) Transplacental transmission of human polyomavirus BK. *J Med Virol* 56: 372–376.
81. Boldorini R, Veggiani C, Amoruso E, Allegrini S, Miglio U, et al. (2008) Latent human polyomavirus infection in pregnancy: investigation of possible transplacental transmission. *Pathology* 40: 72–77.
82. Boldorini R, Allegrini S, Miglio U, Nestasio I, Paganotti A, et al. (2010) BK virus sequences in specimens from aborted fetuses. *J Med Virol* 82: 2127–2132.
83. Boldorini R, Allegrini S, Miglio U, Paganotti A, Cocca N, et al. (2011) Serological evidence of vertical transmission of JC and BK polyomaviruses in humans. *J Gen Virol* 92: 1044–1050.
84. Cajaiba MM, Parks WT, Fuhrer K, Randhawa PS (2011) Evaluation of human polyomavirus BK as a potential cause of villitis of unknown etiology and spontaneous abortion. *J Med Virol* 83: 1031–1033.
